# Supplementary material
Source: PubMed Central journal article supplement (PMC4361744)

**Supplementary Figure 1. Clinical photographs of Proband A.**

The images show the distinctive lipodystrophic fat distribution, including retention of truncal fat and fat loss in the limbs and femorogluteal region.

**Supplementary Figure 2. Skin fold thickness measurements in Proband A.**

Measurements were repeated on several occasions, each of which is represented in a different colour (at age 41 years (red), 42 years (yellow), 43 years (green) and 53 years (blue)). Results are expressed as the mean of two independent measurements and compared to previously reported reference ranges 5<sup>th</sup> percentile and 95<sup>th</sup> percentile in black lines



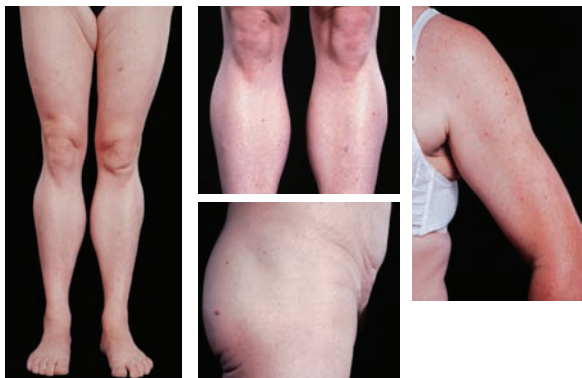

Supplementary Figure 2

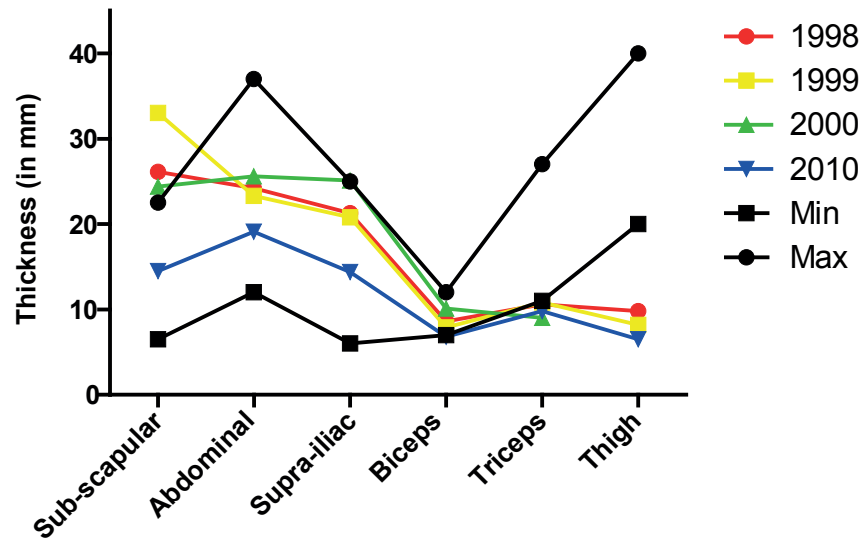

Supplement: NIHMS62571-supplement-01.pdf [file NIHMS62571-supplement-01.pdf]
